# Supplementary material
Source: Springer Nature journal article supplement (https://www.springermedizin.de/resource/supplementary/12874_2012_848_MOESM1_ESM.pdf/9432680)
Supplement: MOESM1 [file 9432680]

24,028 positive blood cultures  
(9,046 patients)

21,705 positive blood cultures with  
physicians' assessment  
(9,587 reference episodes,  
8,278 patients)

2,323 positive blood cultures  
without physicians' assessment  
(1,109 computer episodes,  
1,050 patients)

26 positive blood  
cultures  
(26 reference  
episodes,  
26 patients):  
inconsistent  
physician's  
assessments

21,679 positive blood cultures  
(9,561 reference episodes,  
8,256 patients)

31 positive blood  
cultures  
(10 computer  
episodes,  
10 patients):  
computer  
algorithms  
undefined

124 positive  
blood cultures  
(79 reference  
episodes,  
75 patients):  
computer  
algorithms  
undefined

21,555 positive blood cultures  
(9,482 reference episodes,  
8,195 patients)

2,292 positive blood cultures  
(1,089 computer episodes,  
1,040 patients)
